# Supplementary material
Source: MDPI journal article supplement (https://www.mdpi.com/2073-8994/13/5/906)
Supplement: s1 [file s1]

| subj | sex    | stimulus | side                 | color  | firstChoice | system      | choice  | time |
|------|--------|----------|----------------------|--------|-------------|-------------|---------|------|
| B1   | female | cross    | Correct on the left  | yellow |             | 0 Binocular | correct | 114  |
| B1   | female | cross    | Correct on the left  | yellow |             | 0 Binocular | wrong   | 171  |
| B10  | female | cross    | Correct on the left  | yellow |             | 0 Binocular | correct | 140  |
| B10  | female | cross    | Correct on the left  | yellow |             | 0 Binocular | wrong   | 138  |
| B11  | female | square   | Correct on the left  | blue   |             | 0 Binocular | correct | 114  |
| B11  | female | square   | Correct on the left  | blue   |             | 0 Binocular | wrong   | 114  |
| B12  | female | cross    | Correct on the left  | yellow |             | 0 Binocular | correct | 255  |
| B12  | female | cross    | Correct on the left  | yellow |             | 0 Binocular | wrong   | 19   |
| B13  | male   | square   | Correct on the right | blue   |             | 1 Binocular | correct | 147  |
| B13  | male   | square   | Correct on the right | blue   |             | 1 Binocular | wrong   | 73   |
| B14  | male   | cross    | Correct on the right | yellow |             | 1 Binocular | correct | 241  |
| B14  | male   | cross    | Correct on the right | yellow |             | 1 Binocular | wrong   | 65   |
| B15  | female | square   | Correct on the right | yellow |             | 1 Binocular | correct | 130  |
| B15  | female | square   | Correct on the right | yellow |             | 1 Binocular | wrong   | 171  |
| B16  | female | cross    | Correct on the right | blue   |             | 1 Binocular | correct | 217  |
| B16  | female | cross    | Correct on the right | blue   |             | 1 Binocular | wrong   | 59   |
| B17  | male   | cross    | Correct on the right | blue   |             | 1 Binocular | correct | 123  |
| B17  | male   | cross    | Correct on the right | blue   |             | 1 Binocular | wrong   | 57   |
| B18  | male   | cross    | Correct on the left  | blue   |             | 1 Binocular | correct | 196  |
| B18  | male   | cross    | Correct on the left  | blue   |             | 1 Binocular | wrong   | 24   |
| B19  | male   | square   | Correct on the left  | yellow |             | 0 Binocular | correct | 92   |
| B19  | male   | square   | Correct on the left  | yellow |             | 0 Binocular | wrong   | 136  |
| B2   | female | square   | Correct on the left  | blue   |             | 0 Binocular | correct | 104  |
| B2   | female | square   | Correct on the left  | blue   |             | 0 Binocular | wrong   | 222  |
| B20  | male   | cross    | Correct on the left  | yellow |             | 1 Binocular | correct | 213  |
| B20  | male   | cross    | Correct on the left  | yellow |             | 1 Binocular | wrong   | 87   |
| B21  | female | cross    | Correct on the right | blue   |             | 1 Binocular | correct | 8    |
| B21  | female | cross    | Correct on the right | blue   |             | 1 Binocular | wrong   | 199  |
| B22  | male   | cross    | Correct on the left  | yellow |             | 1 Binocular | correct | 195  |
| B22  | male   | cross    | Correct on the left  | yellow |             | 1 Binocular | wrong   | 119  |
| B23  | male   | square   | Correct on the left  | blue   |             | 0 Binocular | correct | 90   |
| B23  | male   | square   | Correct on the left  | blue   |             | 0 Binocular | wrong   | 48   |
| B24  | male   | cross    | Correct on the left  | yellow |             | 1 Binocular | correct | 254  |
| B24  | male   | cross    | Correct on the left  | yellow |             | 1 Binocular | wrong   | 31   |
| B25  | male   | cross    | Correct on the right | yellow |             | 0 Binocular | correct | 69   |
| B25  | male   | cross    | Correct on the right | yellow |             | 0 Binocular | wrong   | 175  |
| B26  | male   | square   | Correct on the right | yellow |             | 1 Binocular | correct | 173  |
| B26  | male   | square   | Correct on the right | yellow |             | 1 Binocular | wrong   | 45   |
| B27  | male   | cross    | Correct on the right | blue   |             | 1 Binocular | correct | 189  |
| B27  | male   | cross    | Correct on the right | blue   |             | 1 Binocular | wrong   | 93   |
| B28  | male   | cross    | Correct on the right | blue   |             | 0 Binocular | correct | 215  |
| B28  | male   | cross    | Correct on the right | blue   |             | 0 Binocular | wrong   | 84   |
| B29  | male   | cross    | Correct on the left  | blue   |             | 0 Binocular | correct | 108  |
| B29  | male   | cross    | Correct on the left  | blue   |             | 0 Binocular | wrong   | 139  |
| B3   | female | cross    | Correct on the left  | yellow |             | 0 Binocular | correct | 119  |
| B3   | female | cross    | Correct on the left  | yellow |             | 0 Binocular | wrong   | 168  |
| B30  | male   | cross    | Correct on the right | blue   |             | 0 Binocular | correct | 313  |
| B30  | male   | cross    | Correct on the right | blue   |             | 0 Binocular | wrong   | 43   |
| B31  | male   | cross    | Correct on the left  | yellow |             | 0 Binocular | correct | 128  |
| B31  | male   | cross    | Correct on the left  | yellow |             | 0 Binocular | wrong   | 122  |

|     |        |        |                      |        |             |         |     |
|-----|--------|--------|----------------------|--------|-------------|---------|-----|
| B32 | male   | square | Correct on the right | yellow | 1 Binocular | correct | 114 |
| B32 | male   | square | Correct on the right | yellow | 1 Binocular | wrong   | 7   |
| B33 | male   | square | Correct on the left  | yellow | 0 Binocular | correct | 105 |
| B33 | male   | square | Correct on the left  | yellow | 0 Binocular | wrong   | 64  |
| B34 | female | square | Correct on the left  | yellow | 1 Binocular | correct | 177 |
| B34 | female | square | Correct on the left  | yellow | 1 Binocular | wrong   | 120 |
| B35 | male   | cross  | Correct on the right | yellow | 0 Binocular | correct | 173 |
| B35 | male   | cross  | Correct on the right | yellow | 0 Binocular | wrong   | 104 |
| B36 | male   | square | Correct on the left  | blue   | 0 Binocular | correct | 245 |
| B36 | male   | square | Correct on the left  | blue   | 0 Binocular | wrong   | 46  |
| B37 | female | cross  | Correct on the right | blue   | 1 Binocular | correct | 182 |
| B37 | female | cross  | Correct on the right | blue   | 1 Binocular | wrong   | 70  |
| B38 | female | square | Correct on the right | blue   | 0 Binocular | correct | 124 |
| B38 | female | square | Correct on the right | blue   | 0 Binocular | wrong   | 148 |
| B39 | male   | cross  | Correct on the left  | blue   | 0 Binocular | correct | 158 |
| B39 | male   | cross  | Correct on the left  | blue   | 0 Binocular | wrong   | 109 |
| B4  | female | square | Correct on the right | blue   | 1 Binocular | correct | 98  |
| B4  | female | square | Correct on the right | blue   | 1 Binocular | wrong   | 62  |
| B40 | female | square | Correct on the right | blue   | 0 Binocular | correct | 154 |
| B40 | female | square | Correct on the right | blue   | 0 Binocular | wrong   | 134 |
| B41 | female | cross  | Correct on the right | yellow | 0 Binocular | correct | 181 |
| B41 | female | cross  | Correct on the right | yellow | 0 Binocular | wrong   | 151 |
| B42 | female | cross  | Correct on the left  | blue   | 0 Binocular | correct | 40  |
| B42 | female | cross  | Correct on the left  | blue   | 0 Binocular | wrong   | 298 |
| B43 | male   | cross  | Correct on the right | yellow | 1 Binocular | correct | 79  |
| B43 | male   | cross  | Correct on the right | yellow | 1 Binocular | wrong   | 0   |
| B44 | male   | square | Correct on the right | yellow | 1 Binocular | correct | 216 |
| B44 | male   | square | Correct on the right | yellow | 1 Binocular | wrong   | 107 |
| B45 | female | square | Correct on the left  | yellow | 0 Binocular | correct | 77  |
| B45 | female | square | Correct on the left  | yellow | 0 Binocular | wrong   | 71  |
| B46 | female | cross  | Correct on the right | yellow | 0 Binocular | correct | 79  |
| B46 | female | cross  | Correct on the right | yellow | 0 Binocular | wrong   | 184 |
| B47 | male   | square | Correct on the left  | blue   | 0 Binocular | correct | 94  |
| B47 | male   | square | Correct on the left  | blue   | 0 Binocular | wrong   | 82  |
| B48 | male   | cross  | Correct on the left  | blue   | 0 Binocular | correct | 123 |
| B48 | male   | cross  | Correct on the left  | blue   | 0 Binocular | wrong   | 81  |
| B49 | male   | square | Correct on the left  | blue   | 1 Binocular | correct | 97  |
| B49 | male   | square | Correct on the left  | blue   | 1 Binocular | wrong   | 59  |
| B5  | female | cross  | Correct on the right | yellow | 1 Binocular | correct | 191 |
| B5  | female | cross  | Correct on the right | yellow | 1 Binocular | wrong   | 96  |
| B50 | female | cross  | Correct on the left  | blue   | 0 Binocular | correct | 117 |
| B50 | female | cross  | Correct on the left  | blue   | 0 Binocular | wrong   | 167 |
| B51 | female | square | Correct on the right | blue   | 1 Binocular | correct | 254 |
| B51 | female | square | Correct on the right | blue   | 1 Binocular | wrong   | 47  |
| B52 | male   | square | Correct on the left  | yellow | 0 Binocular | correct | 128 |
| B52 | male   | square | Correct on the left  | yellow | 0 Binocular | wrong   | 118 |
| B53 | male   | square | Correct on the left  | yellow | 1 Binocular | correct | 195 |
| B53 | male   | square | Correct on the left  | yellow | 1 Binocular | wrong   | 81  |
| B54 | male   | cross  | Correct on the right | yellow | 1 Binocular | correct | 171 |
| B54 | male   | cross  | Correct on the right | yellow | 1 Binocular | wrong   | 85  |
| B55 | male   | square | Correct on the right | blue   | 1 Binocular | correct | 72  |

|      |        |        |                      |        |             |         |     |
|------|--------|--------|----------------------|--------|-------------|---------|-----|
| B55  | male   | square | Correct on the right | blue   | 1 Binocular | wrong   | 61  |
| B56  | male   | square | Correct on the right | blue   | 1 Binocular | correct | 38  |
| B56  | male   | square | Correct on the right | blue   | 1 Binocular | wrong   | 61  |
| B57  | female | square | Correct on the right | blue   | 1 Binocular | correct | 141 |
| B57  | female | square | Correct on the right | blue   | 1 Binocular | wrong   | 122 |
| B58  | female | cross  | Correct on the left  | blue   | 0 Binocular | correct | 134 |
| B58  | female | cross  | Correct on the left  | blue   | 0 Binocular | wrong   | 131 |
| B59  | male   | cross  | Correct on the left  | blue   | 0 Binocular | correct | 148 |
| B59  | male   | cross  | Correct on the left  | blue   | 0 Binocular | wrong   | 117 |
| B6   | female | square | Correct on the right | yellow | 0 Binocular | correct | 93  |
| B6   | female | square | Correct on the right | yellow | 0 Binocular | wrong   | 82  |
| B60  | female | cross  | Correct on the right | yellow | 1 Binocular | correct | 87  |
| B60  | female | cross  | Correct on the right | yellow | 1 Binocular | wrong   | 26  |
| B61  | female | cross  | Correct on the left  | blue   | 0 Binocular | correct | 131 |
| B61  | female | cross  | Correct on the left  | blue   | 0 Binocular | wrong   | 74  |
| B62  | male   | square | Correct on the right | yellow | 0 Binocular | correct | 31  |
| B62  | male   | square | Correct on the right | yellow | 0 Binocular | wrong   | 27  |
| B63  | male   | square | Correct on the right | yellow | 0 Binocular | correct | 44  |
| B63  | male   | square | Correct on the right | yellow | 0 Binocular | wrong   | 92  |
| B64  | female | square | Correct on the left  | yellow | 0 Binocular | correct | 78  |
| B64  | female | square | Correct on the left  | yellow | 0 Binocular | wrong   | 104 |
| B65  | female | square | Correct on the left  | yellow | 0 Binocular | correct | 88  |
| B65  | female | square | Correct on the left  | yellow | 0 Binocular | wrong   | 76  |
| B66  | female | square | Correct on the right | yellow | 1 Binocular | correct | 155 |
| B66  | female | square | Correct on the right | yellow | 1 Binocular | wrong   | 130 |
| B67  | female | square | Correct on the left  | blue   | 1 Binocular | correct | 148 |
| B67  | female | square | Correct on the left  | blue   | 1 Binocular | wrong   | 22  |
| B68  | male   | square | Correct on the right | blue   | 0 Binocular | correct | 215 |
| B68  | male   | square | Correct on the right | blue   | 0 Binocular | wrong   | 45  |
| B69  | male   | square | Correct on the left  | blue   | 1 Binocular | correct | 172 |
| B69  | male   | square | Correct on the left  | blue   | 1 Binocular | wrong   | 156 |
| B7   | female | cross  | Correct on the right | blue   | 0 Binocular | correct | 45  |
| B7   | female | cross  | Correct on the right | blue   | 0 Binocular | wrong   | 22  |
| B70  | male   | square | Correct on the right | blue   | 1 Binocular | correct | 175 |
| B70  | male   | square | Correct on the right | blue   | 1 Binocular | wrong   | 50  |
| B71  | female | cross  | Correct on the right | yellow | 1 Binocular | correct | 87  |
| B71  | female | cross  | Correct on the right | yellow | 1 Binocular | wrong   | 9   |
| B8   | female | cross  | Correct on the left  | blue   | 0 Binocular | correct | 222 |
| B8   | female | cross  | Correct on the left  | blue   | 0 Binocular | wrong   | 77  |
| B9   | female | square | Correct on the left  | yellow | 1 Binocular | correct | 156 |
| B9   | female | square | Correct on the left  | yellow | 1 Binocular | wrong   | 54  |
| M1   | male   | cross  | Correct on the left  | blue   | 1 Right eye | correct | 298 |
| M1   | male   | cross  | Correct on the left  | blue   | 1 Right eye | wrong   | 9   |
| M10  | female | cross  | Correct on the left  | blue   | 0 Left eye  | correct | 67  |
| M10  | female | cross  | Correct on the left  | blue   | 0 Left eye  | wrong   | 30  |
| M100 | female | cross  | Correct on the left  | blue   | 1 Right eye | correct | 190 |
| M100 | female | cross  | Correct on the left  | blue   | 1 Right eye | wrong   | 165 |
| M101 | male   | square | Correct on the left  | blue   | 1 Left eye  | correct | 197 |
| M101 | male   | square | Correct on the left  | blue   | 1 Left eye  | wrong   | 0   |
| M102 | female | cross  | Correct on the right | blue   | 1 Right eye | correct | 8   |
| M102 | female | cross  | Correct on the right | blue   | 1 Right eye | wrong   | 247 |

|             |        |                      |        |             |         |     |
|-------------|--------|----------------------|--------|-------------|---------|-----|
| M103 male   | square | Correct on the left  | yellow | 0 Left eye  | correct | 64  |
| M103 male   | square | Correct on the left  | yellow | 0 Left eye  | wrong   | 176 |
| M104 female | cross  | Correct on the right | yellow | 1 Right eye | correct | 274 |
| M104 female | cross  | Correct on the right | yellow | 1 Right eye | wrong   | 60  |
| M105 male   | square | Correct on the left  | yellow | 1 Left eye  | correct | 230 |
| M105 male   | square | Correct on the left  | yellow | 1 Left eye  | wrong   | 0   |
| M106 female | cross  | Correct on the right | yellow | 1 Right eye | correct | 320 |
| M106 female | cross  | Correct on the right | yellow | 1 Right eye | wrong   | 21  |
| M107 male   | square | Correct on the right | yellow | 1 Left eye  | correct | 209 |
| M107 male   | square | Correct on the right | yellow | 1 Left eye  | wrong   | 6   |
| M108 female | cross  | Correct on the left  | yellow | 1 Right eye | correct | 33  |
| M108 female | cross  | Correct on the left  | yellow | 1 Right eye | wrong   | 0   |
| M109 male   | square | Correct on the right | blue   | 1 Left eye  | correct | 7   |
| M109 male   | square | Correct on the right | blue   | 1 Left eye  | wrong   | 310 |
| M11 female  | square | Correct on the left  | blue   | 1 Right eye | correct | 263 |
| M11 female  | square | Correct on the left  | blue   | 1 Right eye | wrong   | 0   |
| M110 male   | cross  | Correct on the left  | blue   | 0 Right eye | correct | 109 |
| M110 male   | cross  | Correct on the left  | blue   | 0 Right eye | wrong   | 224 |
| M111 male   | square | Correct on the right | blue   | 0 Left eye  | correct | 117 |
| M111 male   | square | Correct on the right | blue   | 0 Left eye  | wrong   | 212 |
| M112 male   | cross  | Correct on the left  | blue   | 1 Right eye | correct | 316 |
| M112 male   | cross  | Correct on the left  | blue   | 1 Right eye | wrong   | 0   |
| M113 female | square | Correct on the left  | blue   | 1 Left eye  | correct | 158 |
| M113 female | square | Correct on the left  | blue   | 1 Left eye  | wrong   | 188 |
| M114 female | cross  | Correct on the right | blue   | 1 Right eye | correct | 227 |
| M114 female | cross  | Correct on the right | blue   | 1 Right eye | wrong   | 67  |
| M115 female | square | Correct on the left  | yellow | 0 Left eye  | correct | 107 |
| M115 female | square | Correct on the left  | yellow | 0 Left eye  | wrong   | 216 |
| M116 female | cross  | Correct on the right | yellow | 1 Right eye | correct | 209 |
| M116 female | cross  | Correct on the right | yellow | 1 Right eye | wrong   | 145 |
| M117 female | square | Correct on the left  | yellow | 0 Left eye  | correct | 213 |
| M117 female | square | Correct on the left  | yellow | 0 Left eye  | wrong   | 44  |
| M118 female | cross  | Correct on the left  | yellow | 0 Right eye | correct | 296 |
| M118 female | cross  | Correct on the left  | yellow | 0 Right eye | wrong   | 44  |
| M119 female | square | Correct on the left  | blue   | 0 Right eye | correct | 97  |
| M119 female | square | Correct on the left  | blue   | 0 Right eye | wrong   | 185 |
| M12 female  | square | Correct on the right | blue   | 1 Left eye  | correct | 54  |
| M12 female  | square | Correct on the right | blue   | 1 Left eye  | wrong   | 100 |
| M120 female | square | Correct on the right | blue   | 0 Left eye  | correct | 0   |
| M120 female | square | Correct on the right | blue   | 0 Left eye  | wrong   | 129 |
| M121 female | square | Correct on the left  | blue   | 0 Right eye | correct | 39  |
| M121 female | square | Correct on the left  | blue   | 0 Right eye | wrong   | 197 |
| M122 male   | cross  | Correct on the right | blue   | 1 Left eye  | correct | 124 |
| M122 male   | cross  | Correct on the right | blue   | 1 Left eye  | wrong   | 127 |
| M123 male   | cross  | Correct on the left  | yellow | 0 Right eye | correct | 138 |
| M123 male   | cross  | Correct on the left  | yellow | 0 Right eye | wrong   | 35  |
| M124 female | square | Correct on the left  | yellow | 1 Right eye | correct | 171 |
| M124 female | square | Correct on the left  | yellow | 1 Right eye | wrong   | 122 |
| M125 male   | cross  | Correct on the right | yellow | 0 Left eye  | correct | 85  |
| M125 male   | cross  | Correct on the right | yellow | 0 Left eye  | wrong   | 130 |
| M126 female | square | Correct on the right | yellow | 1 Left eye  | correct | 292 |

|             |        |                      |        |             |         |     |
|-------------|--------|----------------------|--------|-------------|---------|-----|
| M126 female | square | Correct on the right | yellow | 1 Left eye  | wrong   | 31  |
| M127 male   | square | Correct on the left  | blue   | 0 Left eye  | correct | 17  |
| M127 male   | square | Correct on the left  | blue   | 0 Left eye  | wrong   | 244 |
| M128 male   | cross  | Correct on the right | blue   | 1 Left eye  | correct | 3   |
| M128 male   | cross  | Correct on the right | blue   | 1 Left eye  | wrong   | 112 |
| M129 female | square | Correct on the right | blue   | 0 Left eye  | correct | 0   |
| M129 female | square | Correct on the right | blue   | 0 Left eye  | wrong   | 151 |
| M13 female  | cross  | Correct on the right | blue   | 1 Right eye | correct | 160 |
| M13 female  | cross  | Correct on the right | blue   | 1 Right eye | wrong   | 0   |
| M130 female | cross  | Correct on the left  | blue   | 0 Left eye  | correct | 101 |
| M130 female | cross  | Correct on the left  | blue   | 0 Left eye  | wrong   | 165 |
| M131 male   | square | Correct on the left  | blue   | 0 Right eye | correct | 104 |
| M131 male   | square | Correct on the left  | blue   | 0 Right eye | wrong   | 165 |
| M132 female | cross  | Correct on the right | blue   | 0 Left eye  | correct | 197 |
| M132 female | cross  | Correct on the right | blue   | 0 Left eye  | wrong   | 144 |
| M133 male   | square | Correct on the right | yellow | 1 Right eye | correct | 231 |
| M133 male   | square | Correct on the right | yellow | 1 Right eye | wrong   | 77  |
| M134 male   | cross  | Correct on the left  | yellow | 0 Right eye | correct | 226 |
| M134 male   | cross  | Correct on the left  | yellow | 0 Right eye | wrong   | 90  |
| M135 male   | square | Correct on the left  | yellow | 0 Right eye | correct | 134 |
| M135 male   | square | Correct on the left  | yellow | 0 Right eye | wrong   | 124 |
| M136 male   | cross  | Correct on the right | yellow | 1 Right eye | correct | 279 |
| M136 male   | cross  | Correct on the right | yellow | 1 Right eye | wrong   | 0   |
| M137 male   | square | Correct on the right | yellow | 0 Right eye | correct | 78  |
| M137 male   | square | Correct on the right | yellow | 0 Right eye | wrong   | 208 |
| M138 female | cross  | Correct on the left  | yellow | 1 Left eye  | correct | 70  |
| M138 female | cross  | Correct on the left  | yellow | 1 Left eye  | wrong   | 136 |
| M14 female  | square | Correct on the left  | yellow | 1 Right eye | correct | 124 |
| M14 female  | square | Correct on the left  | yellow | 1 Right eye | wrong   | 60  |
| M15 female  | cross  | Correct on the right | yellow | 1 Right eye | correct | 175 |
| M15 female  | cross  | Correct on the right | yellow | 1 Right eye | wrong   | 48  |
| M16 female  | square | Correct on the right | yellow | 0 Left eye  | correct | 4   |
| M16 female  | square | Correct on the right | yellow | 0 Left eye  | wrong   | 187 |
| M17 female  | cross  | Correct on the left  | yellow | 1 Left eye  | correct | 162 |
| M17 female  | cross  | Correct on the left  | yellow | 1 Left eye  | wrong   | 27  |
| M18 female  | square | Correct on the left  | yellow | 0 Right eye | correct | 83  |
| M18 female  | square | Correct on the left  | yellow | 0 Right eye | wrong   | 102 |
| M19 male    | square | Correct on the left  | blue   | 0 Left eye  | correct | 28  |
| M19 male    | square | Correct on the left  | blue   | 0 Left eye  | wrong   | 3   |
| M2 male     | square | Correct on the right | blue   | 1 Left eye  | correct | 26  |
| M2 male     | square | Correct on the right | blue   | 1 Left eye  | wrong   | 127 |
| M20 male    | cross  | Correct on the left  | blue   | 0 Left eye  | correct | 78  |
| M20 male    | cross  | Correct on the left  | blue   | 0 Left eye  | wrong   | 43  |
| M21 male    | square | Correct on the right | blue   | 0 Right eye | correct | 96  |
| M21 male    | square | Correct on the right | blue   | 0 Right eye | wrong   | 78  |
| M22 female  | cross  | Correct on the left  | blue   | 0 Right eye | correct | 131 |
| M22 female  | cross  | Correct on the left  | blue   | 0 Right eye | wrong   | 108 |
| M23 male    | cross  | Correct on the right | blue   | 1 Right eye | correct | 96  |
| M23 male    | cross  | Correct on the right | blue   | 1 Right eye | wrong   | 84  |
| M24 male    | cross  | Correct on the right | yellow | 0 Right eye | correct | 121 |
| M24 male    | cross  | Correct on the right | yellow | 0 Right eye | wrong   | 151 |

|     |        |        |                      |        |             |         |     |
|-----|--------|--------|----------------------|--------|-------------|---------|-----|
| M25 | male   | square | Correct on the right | yellow | 0 Right eye | correct | 43  |
| M25 | male   | square | Correct on the right | yellow | 0 Right eye | wrong   | 199 |
| M26 | male   | square | Correct on the left  | yellow | 1 Left eye  | correct | 93  |
| M26 | male   | square | Correct on the left  | yellow | 1 Left eye  | wrong   | 68  |
| M27 | female | cross  | Correct on the right | yellow | 0 Left eye  | correct | 129 |
| M27 | female | cross  | Correct on the right | yellow | 0 Left eye  | wrong   | 133 |
| M28 | female | cross  | Correct on the left  | blue   | 0 Right eye | correct | 44  |
| M28 | female | cross  | Correct on the left  | blue   | 0 Right eye | wrong   | 125 |
| M29 | female | cross  | Correct on the right | yellow | 0 Left eye  | correct | 35  |
| M29 | female | cross  | Correct on the right | yellow | 0 Left eye  | wrong   | 177 |
| M3  | male   | square | Correct on the left  | blue   | 1 Right eye | correct | 118 |
| M3  | male   | square | Correct on the left  | blue   | 1 Right eye | wrong   | 50  |
| M30 | male   | cross  | Correct on the left  | yellow | 0 Left eye  | correct | 71  |
| M30 | male   | cross  | Correct on the left  | yellow | 0 Left eye  | wrong   | 153 |
| M31 | male   | cross  | Correct on the left  | yellow | 1 Right eye | correct | 114 |
| M31 | male   | cross  | Correct on the left  | yellow | 1 Right eye | wrong   | 211 |
| M32 | male   | cross  | Correct on the right | yellow | 0 Left eye  | correct | 282 |
| M32 | male   | cross  | Correct on the right | yellow | 0 Left eye  | wrong   | 21  |
| M33 | male   | square | Correct on the right | yellow | 1 Left eye  | correct | 185 |
| M33 | male   | square | Correct on the right | yellow | 1 Left eye  | wrong   | 122 |
| M34 | male   | square | Correct on the left  | yellow | 0 Left eye  | correct | 56  |
| M34 | male   | square | Correct on the left  | yellow | 0 Left eye  | wrong   | 110 |
| M35 | female | cross  | Correct on the left  | yellow | 1 Right eye | correct | 97  |
| M35 | female | cross  | Correct on the left  | yellow | 1 Right eye | wrong   | 184 |
| M36 | female | square | Correct on the left  | yellow | 1 Left eye  | correct | 181 |
| M36 | female | square | Correct on the left  | yellow | 1 Left eye  | wrong   | 0   |
| M37 | female | square | Correct on the right | yellow | 0 Right eye | correct | 245 |
| M37 | female | square | Correct on the right | yellow | 0 Right eye | wrong   | 76  |
| M38 | female | cross  | Correct on the right | yellow | 0 Left eye  | correct | 43  |
| M38 | female | cross  | Correct on the right | yellow | 0 Left eye  | wrong   | 272 |
| M39 | male   | cross  | Correct on the right | blue   | 0 Left eye  | correct | 59  |
| M39 | male   | cross  | Correct on the right | blue   | 0 Left eye  | wrong   | 260 |
| M4  | male   | cross  | Correct on the right | blue   | 0 Right eye | correct | 6   |
| M4  | male   | cross  | Correct on the right | blue   | 0 Right eye | wrong   | 29  |
| M40 | male   | cross  | Correct on the left  | blue   | 1 Left eye  | correct | 272 |
| M40 | male   | cross  | Correct on the left  | blue   | 1 Left eye  | wrong   | 32  |
| M41 | male   | square | Correct on the right | blue   | 1 Right eye | correct | 174 |
| M41 | male   | square | Correct on the right | blue   | 1 Right eye | wrong   | 176 |
| M42 | female | cross  | Correct on the right | blue   | 1 Right eye | correct | 296 |
| M42 | female | cross  | Correct on the right | blue   | 1 Right eye | wrong   | 55  |
| M43 | female | square | Correct on the right | blue   | 1 Right eye | correct | 39  |
| M43 | female | square | Correct on the right | blue   | 1 Right eye | wrong   | 308 |
| M44 | female | square | Correct on the left  | blue   | 1 Left eye  | correct | 241 |
| M44 | female | square | Correct on the left  | blue   | 1 Left eye  | wrong   | 65  |
| M45 | female | cross  | Correct on the left  | blue   | 0 Left eye  | correct | 233 |
| M45 | female | cross  | Correct on the left  | blue   | 0 Left eye  | wrong   | 74  |
| M46 | male   | cross  | Correct on the right | yellow | 1 Left eye  | correct | 236 |
| M46 | male   | cross  | Correct on the right | yellow | 1 Left eye  | wrong   | 0   |
| M47 | female | square | Correct on the right | yellow | 0 Left eye  | correct | 281 |
| M47 | female | square | Correct on the right | yellow | 0 Left eye  | wrong   | 62  |
| M48 | female | cross  | Correct on the left  | yellow | 1 Left eye  | correct | 163 |

|     |        |        |                      |        |             |         |     |
|-----|--------|--------|----------------------|--------|-------------|---------|-----|
| M48 | female | cross  | Correct on the left  | yellow | 1 Left eye  | wrong   | 105 |
| M49 | female | square | Correct on the left  | yellow | 1 Left eye  | correct | 228 |
| M49 | female | square | Correct on the left  | yellow | 1 Left eye  | wrong   | 61  |
| M5  | male   | square | Correct on the left  | yellow | 0 Right eye | correct | 51  |
| M5  | male   | square | Correct on the left  | yellow | 0 Right eye | wrong   | 71  |
| M50 | male   | square | Correct on the left  | yellow | 1 Right eye | correct | 110 |
| M50 | male   | square | Correct on the left  | yellow | 1 Right eye | wrong   | 41  |
| M51 | male   | cross  | Correct on the right | yellow | 1 Right eye | correct | 120 |
| M51 | male   | cross  | Correct on the right | yellow | 1 Right eye | wrong   | 201 |
| M52 | male   | square | Correct on the left  | blue   | 0 Right eye | correct | 51  |
| M52 | male   | square | Correct on the left  | blue   | 0 Right eye | wrong   | 79  |
| M53 | male   | cross  | Correct on the left  | blue   | 1 Right eye | correct | 251 |
| M53 | male   | cross  | Correct on the left  | blue   | 1 Right eye | wrong   | 0   |
| M54 | female | square | Correct on the left  | blue   | 0 Left eye  | correct | 114 |
| M54 | female | square | Correct on the left  | blue   | 0 Left eye  | wrong   | 162 |
| M55 | female | cross  | Correct on the right | blue   | 0 Left eye  | correct | 66  |
| M55 | female | cross  | Correct on the right | blue   | 0 Left eye  | wrong   | 149 |
| M56 | female | square | Correct on the right | blue   | 1 Left eye  | correct | 143 |
| M56 | female | square | Correct on the right | blue   | 1 Left eye  | wrong   | 117 |
| M57 | male   | square | Correct on the right | blue   | 0 Left eye  | correct | 1   |
| M57 | male   | square | Correct on the right | blue   | 0 Left eye  | wrong   | 127 |
| M58 | female | cross  | Correct on the left  | blue   | 0 Left eye  | correct | 14  |
| M58 | female | cross  | Correct on the left  | blue   | 0 Left eye  | wrong   | 224 |
| M59 | male   | cross  | Correct on the left  | yellow | 0 Right eye | correct | 215 |
| M59 | male   | cross  | Correct on the left  | yellow | 0 Right eye | wrong   | 73  |
| M6  | male   | cross  | Correct on the right | yellow | 1 Left eye  | correct | 54  |
| M6  | male   | cross  | Correct on the right | yellow | 1 Left eye  | wrong   | 62  |
| M60 | male   | square | Correct on the right | yellow | 1 Right eye | correct | 198 |
| M60 | male   | square | Correct on the right | yellow | 1 Right eye | wrong   | 52  |
| M61 | female | cross  | Correct on the left  | yellow | 0 Right eye | correct | 126 |
| M61 | female | cross  | Correct on the left  | yellow | 0 Right eye | wrong   | 194 |
| M62 | female | square | Correct on the right | yellow | 1 Right eye | correct | 197 |
| M62 | female | square | Correct on the right | yellow | 1 Right eye | wrong   | 96  |
| M63 | male   | square | Correct on the left  | yellow | 1 Left eye  | correct | 116 |
| M63 | male   | square | Correct on the left  | yellow | 1 Left eye  | wrong   | 172 |
| M64 | female | cross  | Correct on the right | blue   | 0 Right eye | correct | 156 |
| M64 | female | cross  | Correct on the right | blue   | 0 Right eye | wrong   | 128 |
| M65 | female | square | Correct on the left  | blue   | 1 Left eye  | correct | 163 |
| M65 | female | square | Correct on the left  | blue   | 1 Left eye  | wrong   | 116 |
| M66 | male   | cross  | Correct on the right | blue   | 0 Left eye  | correct | 0   |
| M66 | male   | cross  | Correct on the right | blue   | 0 Left eye  | wrong   | 310 |
| M67 | male   | square | Correct on the left  | blue   | 1 Right eye | correct | 228 |
| M67 | male   | square | Correct on the left  | blue   | 1 Right eye | wrong   | 90  |
| M68 | female | square | Correct on the right | blue   | 1 Right eye | correct | 143 |
| M68 | female | square | Correct on the right | blue   | 1 Right eye | wrong   | 157 |
| M69 | female | square | Correct on the right | yellow | 0 Left eye  | correct | 242 |
| M69 | female | square | Correct on the right | yellow | 0 Left eye  | wrong   | 113 |
| M7  | male   | square | Correct on the right | yellow | 1 Left eye  | correct | 0   |
| M7  | male   | square | Correct on the right | yellow | 1 Left eye  | wrong   | 12  |
| M70 | female | square | Correct on the left  | yellow | 1 Left eye  | correct | 250 |
| M70 | female | square | Correct on the left  | yellow | 1 Left eye  | wrong   | 48  |

|     |        |        |                      |        |             |         |     |
|-----|--------|--------|----------------------|--------|-------------|---------|-----|
| M71 | male   | cross  | Correct on the left  | yellow | 1 Left eye  | correct | 192 |
| M71 | male   | cross  | Correct on the left  | yellow | 1 Left eye  | wrong   | 100 |
| M72 | male   | square | Correct on the right | yellow | 0 Right eye | correct | 242 |
| M72 | male   | square | Correct on the right | yellow | 0 Right eye | wrong   | 32  |
| M73 | male   | square | Correct on the left  | blue   | 0 Left eye  | correct | 49  |
| M73 | male   | square | Correct on the left  | blue   | 0 Left eye  | wrong   | 274 |
| M74 | male   | square | Correct on the right | blue   | 1 Right eye | correct | 133 |
| M74 | male   | square | Correct on the right | blue   | 1 Right eye | wrong   | 218 |
| M75 | female | cross  | Correct on the right | blue   | 0 Left eye  | correct | 100 |
| M75 | female | cross  | Correct on the right | blue   | 0 Left eye  | wrong   | 154 |
| M76 | female | square | Correct on the left  | blue   | 0 Left eye  | correct | 248 |
| M76 | female | square | Correct on the left  | blue   | 0 Left eye  | wrong   | 91  |
| M77 | male   | cross  | Correct on the right | blue   | 0 Left eye  | correct | 0   |
| M77 | male   | cross  | Correct on the right | blue   | 0 Left eye  | wrong   | 102 |
| M78 | female | square | Correct on the right | blue   | 1 Right eye | correct | 127 |
| M78 | female | square | Correct on the right | blue   | 1 Right eye | wrong   | 165 |
| M79 | male   | cross  | Correct on the left  | blue   | 1 Right eye | correct | 208 |
| M79 | male   | cross  | Correct on the left  | blue   | 1 Right eye | wrong   | 26  |
| M8  | male   | cross  | Correct on the left  | yellow | 0 Left eye  | correct | 128 |
| M8  | male   | cross  | Correct on the left  | yellow | 0 Left eye  | wrong   | 82  |
| M80 | female | square | Correct on the left  | blue   | 1 Left eye  | correct | 59  |
| M80 | female | square | Correct on the left  | blue   | 1 Left eye  | wrong   | 16  |
| M81 | male   | cross  | Correct on the right | blue   | 1 Right eye | correct | 100 |
| M81 | male   | cross  | Correct on the right | blue   | 1 Right eye | wrong   | 111 |
| M82 | female | square | Correct on the right | yellow | 1 Right eye | correct | 290 |
| M82 | female | square | Correct on the right | yellow | 1 Right eye | wrong   | 14  |
| M83 | male   | cross  | Correct on the left  | yellow | 1 Right eye | correct | 37  |
| M83 | male   | cross  | Correct on the left  | yellow | 1 Right eye | wrong   | 175 |
| M84 | female | square | Correct on the left  | yellow | 1 Left eye  | correct | 274 |
| M84 | female | square | Correct on the left  | yellow | 1 Left eye  | wrong   | 57  |
| M85 | male   | cross  | Correct on the right | yellow | 1 Left eye  | correct | 10  |
| M85 | male   | cross  | Correct on the right | yellow | 1 Left eye  | wrong   | 221 |
| M86 | female | square | Correct on the right | yellow | 1 Right eye | correct | 100 |
| M86 | female | square | Correct on the right | yellow | 1 Right eye | wrong   | 132 |
| M87 | male   | cross  | Correct on the left  | yellow | 1 Left eye  | correct | 231 |
| M87 | male   | cross  | Correct on the left  | yellow | 1 Left eye  | wrong   | 40  |
| M88 | female | square | Correct on the right | blue   | 0 Right eye | correct | 0   |
| M88 | female | square | Correct on the right | blue   | 0 Right eye | wrong   | 102 |
| M89 | male   | cross  | Correct on the left  | blue   | 1 Left eye  | correct | 42  |
| M89 | male   | cross  | Correct on the left  | blue   | 1 Left eye  | wrong   | 286 |
| M9  | male   | square | Correct on the left  | yellow | 1 Right eye | correct | 214 |
| M9  | male   | square | Correct on the left  | yellow | 1 Right eye | wrong   | 2   |
| M90 | female | square | Correct on the left  | blue   | 0 Right eye | correct | 298 |
| M90 | female | square | Correct on the left  | blue   | 0 Right eye | wrong   | 43  |
| M91 | female | square | Correct on the left  | yellow | 1 Right eye | correct | 298 |
| M91 | female | square | Correct on the left  | yellow | 1 Right eye | wrong   | 0   |
| M92 | male   | cross  | Correct on the right | yellow | 1 Left eye  | correct | 204 |
| M92 | male   | cross  | Correct on the right | yellow | 1 Left eye  | wrong   | 73  |
| M93 | female | square | Correct on the left  | yellow | 0 Right eye | correct | 0   |
| M93 | female | square | Correct on the left  | yellow | 0 Right eye | wrong   | 156 |
| M94 | male   | cross  | Correct on the right | yellow | 0 Left eye  | correct | 0   |



|     |        |        |                      |        |             |         |     |
|-----|--------|--------|----------------------|--------|-------------|---------|-----|
| M94 | male   | cross  | Correct on the right | yellow | 0 Left eye  | wrong   | 271 |
| M95 | female | square | Correct on the right | yellow | 1 Right eye | correct | 359 |
| M95 | female | square | Correct on the right | yellow | 1 Right eye | wrong   | 0   |
| M96 | male   | cross  | Correct on the left  | yellow | 1 Left eye  | correct | 206 |
| M96 | male   | cross  | Correct on the left  | yellow | 1 Left eye  | wrong   | 135 |
| M97 | male   | square | Correct on the right | blue   | 1 Left eye  | correct | 44  |
| M97 | male   | square | Correct on the right | blue   | 1 Left eye  | wrong   | 230 |
| M98 | female | cross  | Correct on the left  | blue   | 0 Right eye | correct | 143 |
| M98 | female | cross  | Correct on the left  | blue   | 0 Right eye | wrong   | 65  |
| M99 | male   | square | Correct on the right | blue   | 1 Left eye  | correct | 87  |
| M99 | male   | square | Correct on the right | blue   | 1 Left eye  | wrong   | 49  |
