# Supplementary material
Source: MDPI journal article supplement (https://www.mdpi.com/2073-8994/13/5/906)
Supplement: s1 [file s1]

**Supplementary 1** – ANOVA for the lowest AIC model of the selection. In bold predictors with  $p < 0.05$

|                                             | Sum.Sq.       | Mean.Sq.      | Num.DF   | Den.DF     | F. value     | p. Value           |
|---------------------------------------------|---------------|---------------|----------|------------|--------------|--------------------|
| <b>stim.value</b>                           | <b>152175</b> | <b>152175</b> | <b>1</b> | <b>394</b> | <b>22.75</b> | <b>&lt; 0.0001</b> |
| condition                                   | 0             | 0             | 2        | 394        | 0            | 1.0000             |
| position                                    | 0             | 0             | 1        | 394        | 0            | 1.0000             |
| colour                                      | 0             | 0             | 1        | 394        | 0            | 1.0000             |
| <b>stim.value:condition</b>                 | <b>118650</b> | <b>59325</b>  | <b>2</b> | <b>394</b> | <b>8.87</b>  | <b>0.0002</b>      |
| <b>stim.value:position</b>                  | <b>36564</b>  | <b>36564</b>  | <b>1</b> | <b>394</b> | <b>5.47</b>  | <b>0.0199</b>      |
| condition:position                          | 0             | 0             | 2        | 394        | 0            | 1.0000             |
| <b>stim.value:colour</b>                    | <b>37894</b>  | <b>37894</b>  | <b>1</b> | <b>394</b> | <b>5.66</b>  | <b>0.0178</b>      |
| condition:colour                            | 0             | 0             | 2        | 394        | 0            | 1.0000             |
| position:colour                             | 0             | 0             | 1        | 394        | 0            | 1.0000             |
| <b>stim.value:condition:position</b>        | <b>86778</b>  | <b>43389</b>  | <b>2</b> | <b>394</b> | <b>6.49</b>  | <b>0.0017</b>      |
| <b>stim.value:condition:colour</b>          | <b>42739</b>  | <b>21369</b>  | <b>2</b> | <b>394</b> | <b>3.19</b>  | <b>0.0420</b>      |
| <b>stim.value:position:colour</b>           | <b>44355</b>  | <b>44355</b>  | <b>1</b> | <b>394</b> | <b>6.63</b>  | <b>0.0104</b>      |
| condition:position:colour                   | 0             | 0             | 2        | 394        | 0            | 1.0000             |
| <b>stim.value:condition:position:colour</b> | <b>69711</b>  | <b>34856</b>  | <b>2</b> | <b>394</b> | <b>5.21</b>  | <b>0.0058</b>      |
