# Supplementary material
Source: MDPI journal article supplement (https://www.mdpi.com/2073-8994/13/5/906)
Supplement: s1 [file s1]

**Supplementary 2** – Post hoc analysis with Bonferroni correction. All the results are referred to the time spent near the correct stimulus minus the time spent near the wrong one. As such, positive values refer to a preference for the correct stimulus, negative ones to a preference for the wrong stimulus. The first three rows are referred to the overall performance in the corresponding condition, regardless of the position of the stimulus or the colour of the room. In bold results with  $p < 0.05$ .

| condition        | colour        | position     | estimate       | SE           | DF            | t. ratio     | p. value          |
|------------------|---------------|--------------|----------------|--------------|---------------|--------------|-------------------|
| <b>Binocular</b> | -             | -            | <b>62.12</b>   | <b>13.70</b> | <b>197.00</b> | <b>4.52</b>  | <b>0.0002</b>     |
| Left eye         | -             | -            | -9.26          | 13.70        | 197.00        | -0.67        | 1.0000            |
| <b>Right eye</b> | -             | -            | <b>61.81</b>   | <b>14.20</b> | <b>197.00</b> | <b>4.36</b>  | <b>0.0003</b>     |
| Binocular        | blue          | left         | 45.56          | 27.30        | 197.00        | 1.67         | 1.0000            |
| <b>Binocular</b> | <b>blue</b>   | <b>right</b> | <b>95.33</b>   | <b>27.30</b> | <b>197.00</b> | <b>3.50</b>  | <b>0.0087</b>     |
| Binocular        | yellow        | left         | 58.47          | 28.10        | 197.00        | 2.08         | 0.5764            |
| Binocular        | yellow        | right        | 49.11          | 27.30        | 197.00        | 1.80         | 1.0000            |
| Left eye         | blue          | left         | 39.76          | 28.10        | 197.00        | 1.42         | 1.0000            |
| <b>Left eye</b>  | <b>blue</b>   | <b>right</b> | <b>-136.67</b> | <b>27.30</b> | <b>197.00</b> | <b>-5.01</b> | <b>&lt;.00001</b> |
| Left eye         | yellow        | left         | 57.16          | 26.50        | 197.00        | 2.15         | 0.4868            |
| Left eye         | yellow        | right        | 2.71           | 28.10        | 197.00        | 0.10         | 1.0000            |
| <b>Right eye</b> | <b>blue</b>   | <b>left</b>  | <b>90.24</b>   | <b>28.10</b> | <b>197.00</b> | <b>3.22</b>  | <b>0.0227</b>     |
| Right eye        | blue          | right        | -19.33         | 29.90        | 197.00        | -0.65        | 1.0000            |
| Right eye        | yellow        | left         | 50.56          | 27.30        | 197.00        | 1.85         | 0.9777            |
| <b>Right eye</b> | <b>yellow</b> | <b>right</b> | <b>125.76</b>  | <b>28.10</b> | <b>197.00</b> | <b>4.48</b>  | <b>0.0002</b>     |
