# Supplementary material
Source: MDPI journal article supplement (https://www.mdpi.com/2073-8994/13/5/906)
Supplement: s1 [file s1]

Archive with 4 entries (4 files):
- S1.pdf
- S2.pdf
- S3.pdf
- S4.mp4
